# Supplementary material for: Nucleophagic Degradation of Progerin Ameliorates Defenestration in Liver Sinusoidal Endothelium Due to SIRT1-Mediated Deacetylation of Nuclear LC3
Source: MDPI journal article supplement (doi:10.3390/cells11233918), 2022-12-03
Supplement: s1 [file s1]

# Supplementary

## Supplementary methods

The following primer sequences were used for RT-qPCR. Human progerin primer (sense: 5'-GCGTCAGGAGCCCTGAGC-3'; antisense: 5'-GACGCAGGAAGCCTCCAC-3'). Rat NOX2 primer (sense: 5'-CATTTTCGTCAAGCGTCCCG-3'; antisense: 5'-AGTCGCCAACAATGCGGATA-3'). Rat NOX4 primer (sense: 5'-TTCGGGTGGCTTGTTGAAGT-3'; antisense: 5'-TGGGGTCCGGTTAAGACTGA-3'). Rat *LMNA* primer (sense: 5'-GCCTTCGCATCACTGAGTCT-3'; antisense: 5'-TCCTTGAACTCCTCACGCAC-3'). Rat Lamin B1 primer (sense: 5'-TTTCACAGAGCCGTCGTTCA-3'; antisense: 5'-GCGCACGTGAAGAGAAAGTC-3'). Rat Cav-1 primer (sense: 5'-GCGCCTTTCCCCCTCTATAC-3'; antisense: 5'-GGGCTTGTAGATGTTGCCCT-3').

## Supplementary figures and their legends

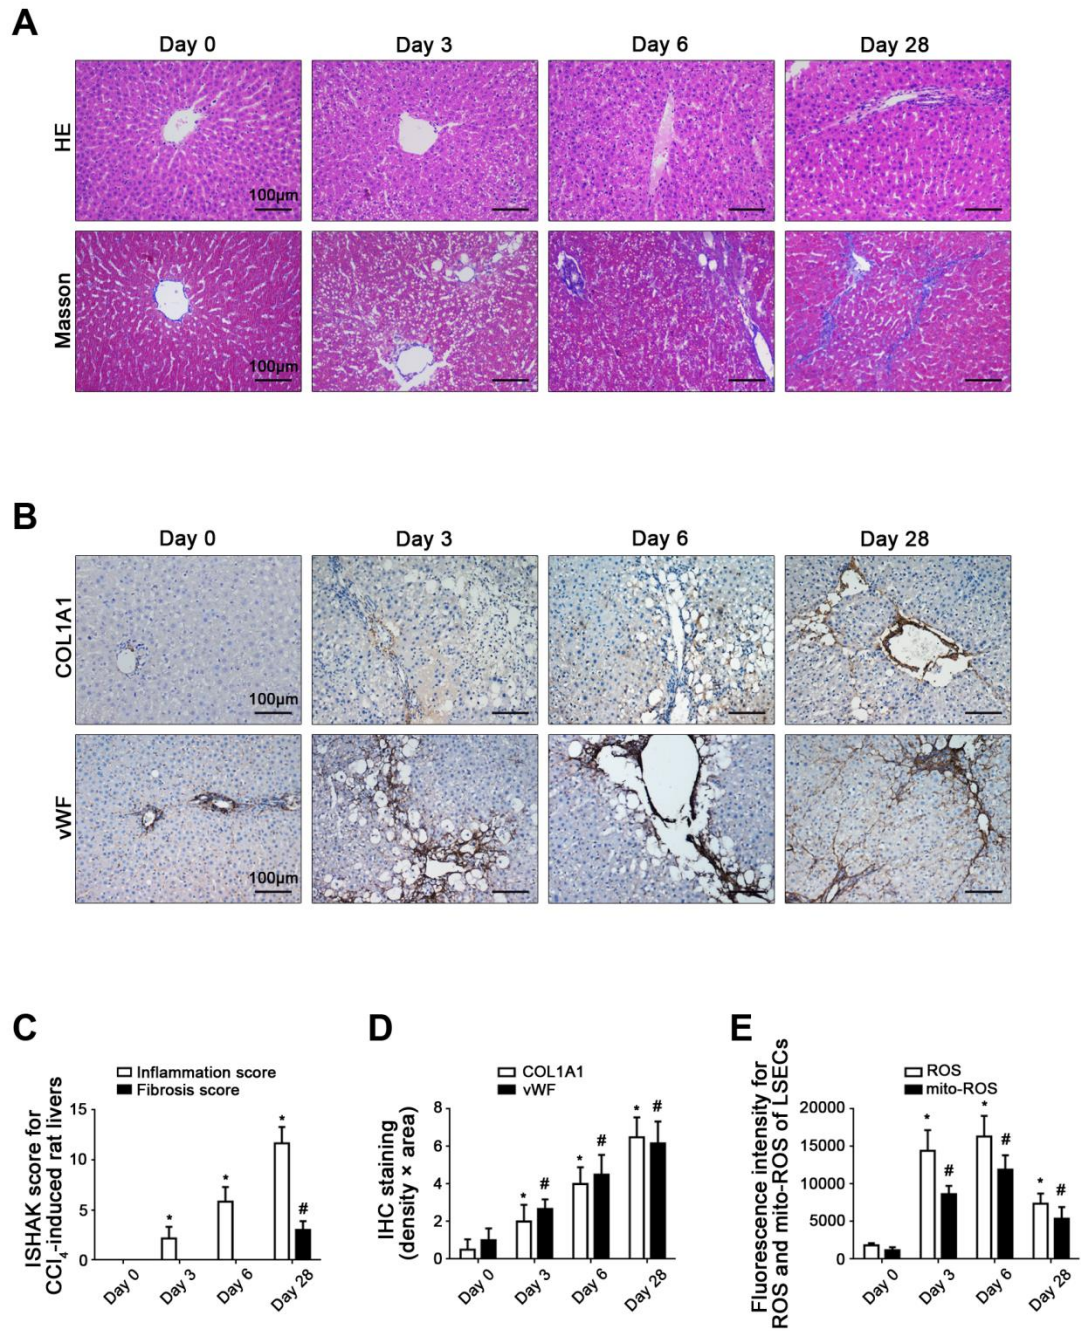

**Supplementary Figure S1 Oxidative damage occurs in liver sinusoidal endothelial cells (LSECs) during  $\text{CCl}_4$ -induced rat liver fibrogenesis.**

(A) Hematoxylin-eosin (HE) staining and Masson staining in liver tissue of  $\text{CCl}_4$ -induced rat models at different time points (Day 0, Day 3, Day 6, and Day 28) (Scale bar: 100  $\mu\text{m}$ ). (B) The immunohistochemical (IHC) staining of COL1A1 and vWF in liver tissue of  $\text{CCl}_4$ -induced rat models at different time points (Day 0, Day 3, Day 6, and Day 28) (Scale bar: 100  $\mu\text{m}$ ). (C) The quantified analysis of liver inflammation and fibrosis with ISHAK

score in the graph.  $*P<0.05$  versus the inflammation score of the Day 0 group;  $^{\#}P<0.05$  versus the fibrosis score of the Day 0 group. **(D)** The semi-quantified analysis for the area density of IHC staining of COL1A1 and vWF in the graph.  $*P<0.05$  versus COL1A1 expression of the Day 0 group;  $^{\#}P<0.05$  versus vWF expression of the Day 0 group. **(E)** Fluorescence intensity for reactive oxygen species (ROS) and mito-ROS of rat primary LSECs, which were isolated from CCl<sub>4</sub>-induced rat models at different time points (Day 0, Day 3, Day 6, and Day 28).  $*P<0.05$  versus ROS of the Day 0 group;  $^{\#}P<0.05$  versus mito-ROS of the Day 0 group. N=6 per group.

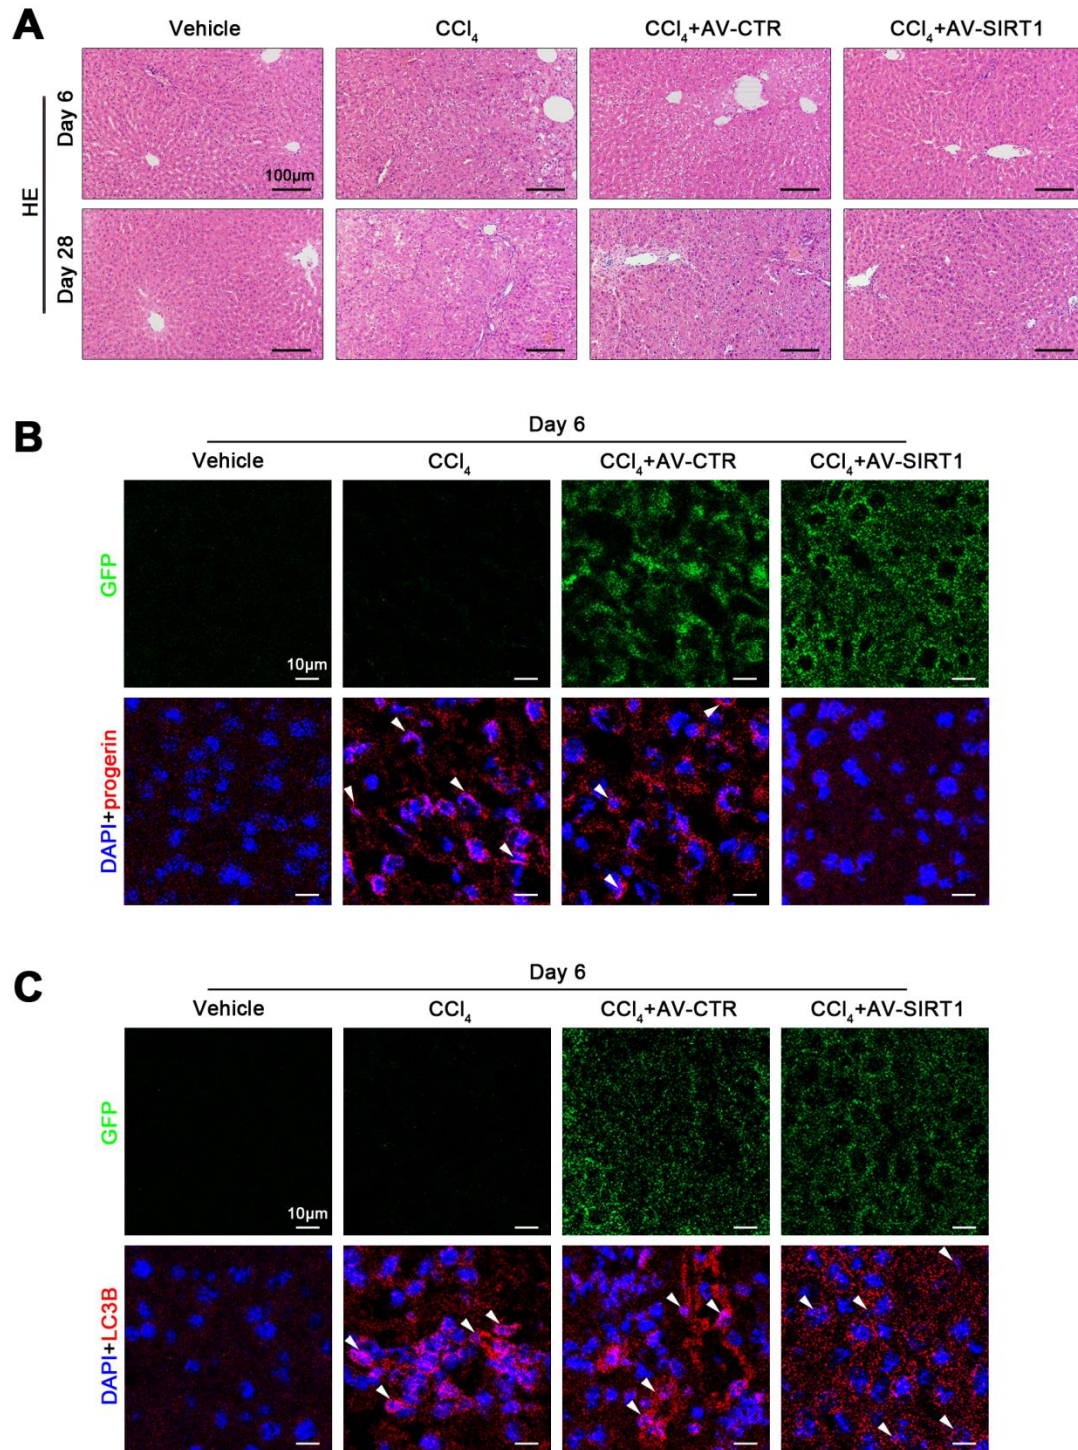

**Supplementary Figure S2 Overexpressing SIRT1 reduces progerin expression to improve CCl<sub>4</sub>-induced rat liver fibrosis.**

(A) HE staining in liver tissue of CCl<sub>4</sub>-induced rat models in the four groups (vehicle, CCl<sub>4</sub>, CCl<sub>4</sub>+AV-CTR, CCl<sub>4</sub>+AV-SIRT1) on Day 6 and Day 28 (Scale bar: 100 μm). (B) The immunofluorescent (IF) staining for progerin (red) in liver tissue of CCl<sub>4</sub>-induced rat models in the four groups on Day 6 (Scale bar: 10 μm). Adenovirus vectors were showed



by GFP (green). Nuclei were showed by DAPI (blue). (C) The IF staining for LC3B (red) in liver tissue of CCl<sub>4</sub>-induced rat models in the four groups on Day 6 (Scale bar: 10  $\mu$ m). Adenovirus vectors were showed by GFP (green). Nuclei were showed by DAPI (blue). N=12 per group.

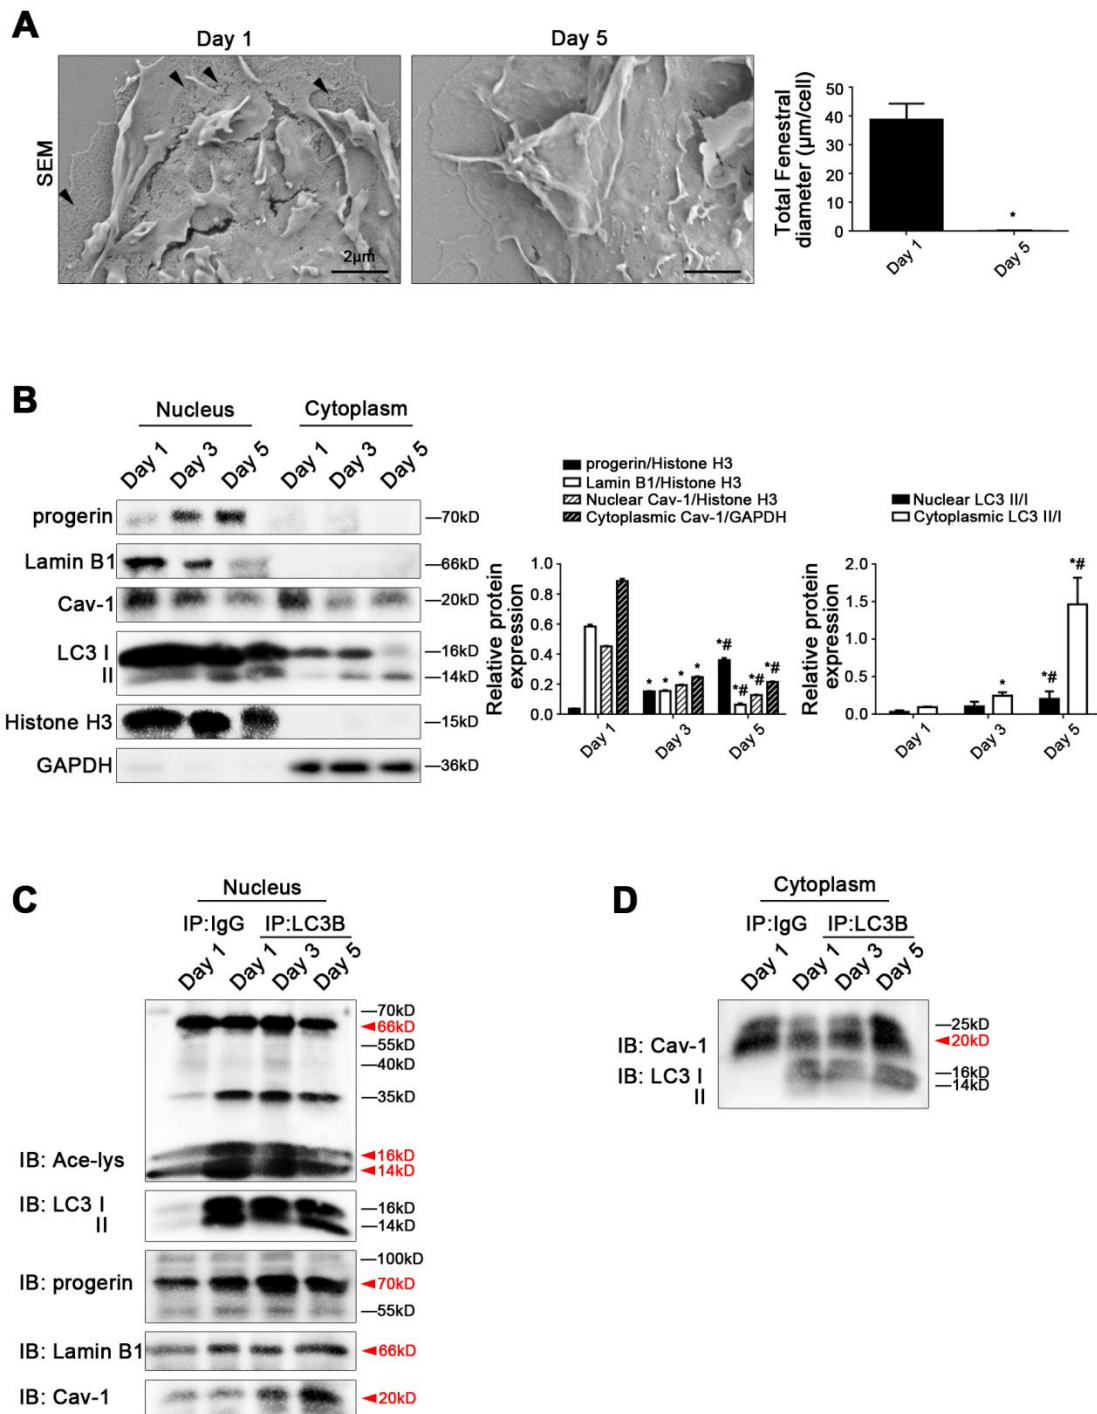

**Supplementary Figure S3 Progerin abnormally generates in defenestrated LSECs, along with depletion of Lamin B1 and Cav-1.**

Freshly rat primary LSECs were isolated from normal male SD rats and cultured *in vitro* for five days. **(A)** The magnification of SEM for fenestrae in primary LSECs on Day 1 and Day 5 (Scale bar: 2  $\mu$ m). The black triangles indicated fenestrae in LSECs. The total fenestral diameter was quantified in the graph, right. \* $P$ <0.05 versus the Day 1 group. **(B)** Representative immunoblots of progerin, Lamin B1, Cav-1, and LC3 II/I in nucleus and cytoplasm of primary LSECs on Day 1, Day 3, and Day 5. The relative protein expression and LC3 II/I expression in nucleus and cytoplasm were quantified in the two graphs (right). \* $P$ <0.05 versus the Day 1 group; # $P$ <0.05 versus the Day 3 group. **(C)** The interaction of nuclear LC3B with acetyl Lysine, progerin, Lamin B1, and Cav-1 was detected by the co-IP assay. Nuclear LC3B in primary LSECs was individually immunoprecipitated, and subsequently acetyl Lysine, progerin, Lamin B1, Cav-1, and LC3 II/I in nucleus of LSECs were subjected to immunoblotting analysis. **(D)** The interaction of cytoplasmic LC3B with Cav-1 was detected by the co-IP assay. Cytoplasmic LC3B in primary LSECs was individually immunoprecipitated, and subsequently Cav-1 and LC3 II/I in cytoplasm of LSECs were subjected to immunoblotting analysis.

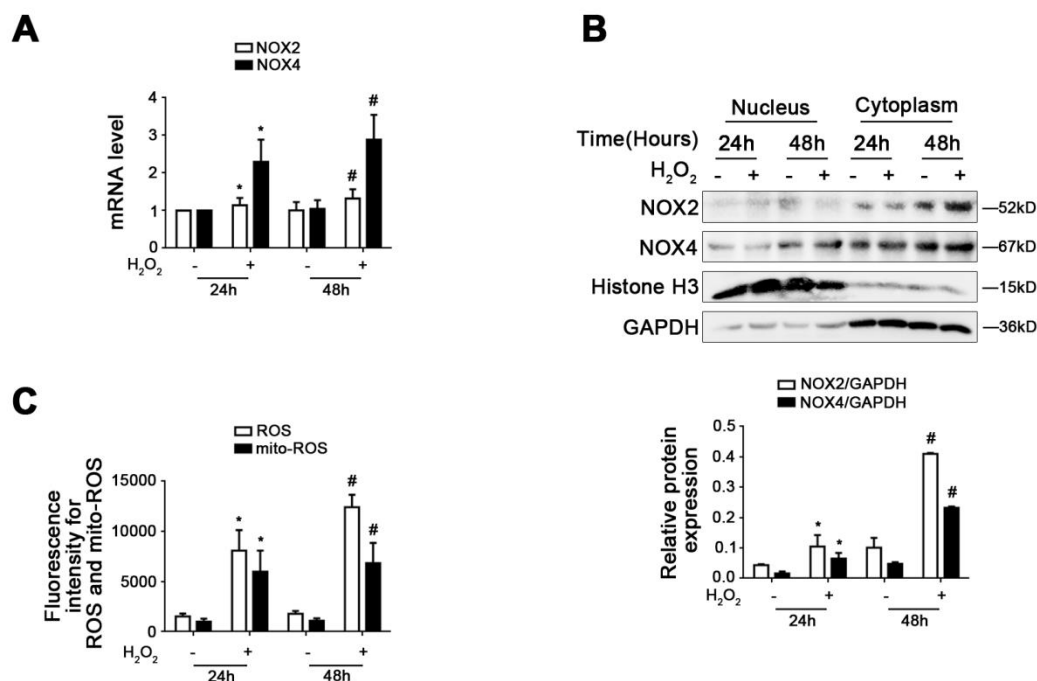

**Supplementary Figure S4 H<sub>2</sub>O<sub>2</sub> up-regulates NOX2- and NOX4-dependent oxidative damage to induce defenestration in LSECs.**

Freshly rat primary LSECs, isolated from normal male SD rats, were treated with H<sub>2</sub>O<sub>2</sub> (10  $\mu$ M) *in vitro* for 48 hours. **(A)** RT-qPCR analysis for mRNA levels of NOX2 and NOX4 of primary LSECs in 24 hours and 48 hours. \**P*<0.05 versus the control group in 24 hours; #*P*<0.05 versus the control group in 48 hours. **(B)** Representative immunoblots of NOX2 and NOX4 in nucleus and cytoplasm of primary LSECs in 24 hours and 48 hours. The relative protein expression was quantified in the graph (below). \**P*<0.05 versus the control group in 24 hours; #*P*<0.05 versus the control group in 48 hours. **(C)** Fluorescence intensity for ROS and mito-ROS of primary LSECs in 24 hours and 48 hours. \**P*<0.05 versus the control group in 24 hours; #*P*<0.05 versus the control group in 48 hours.

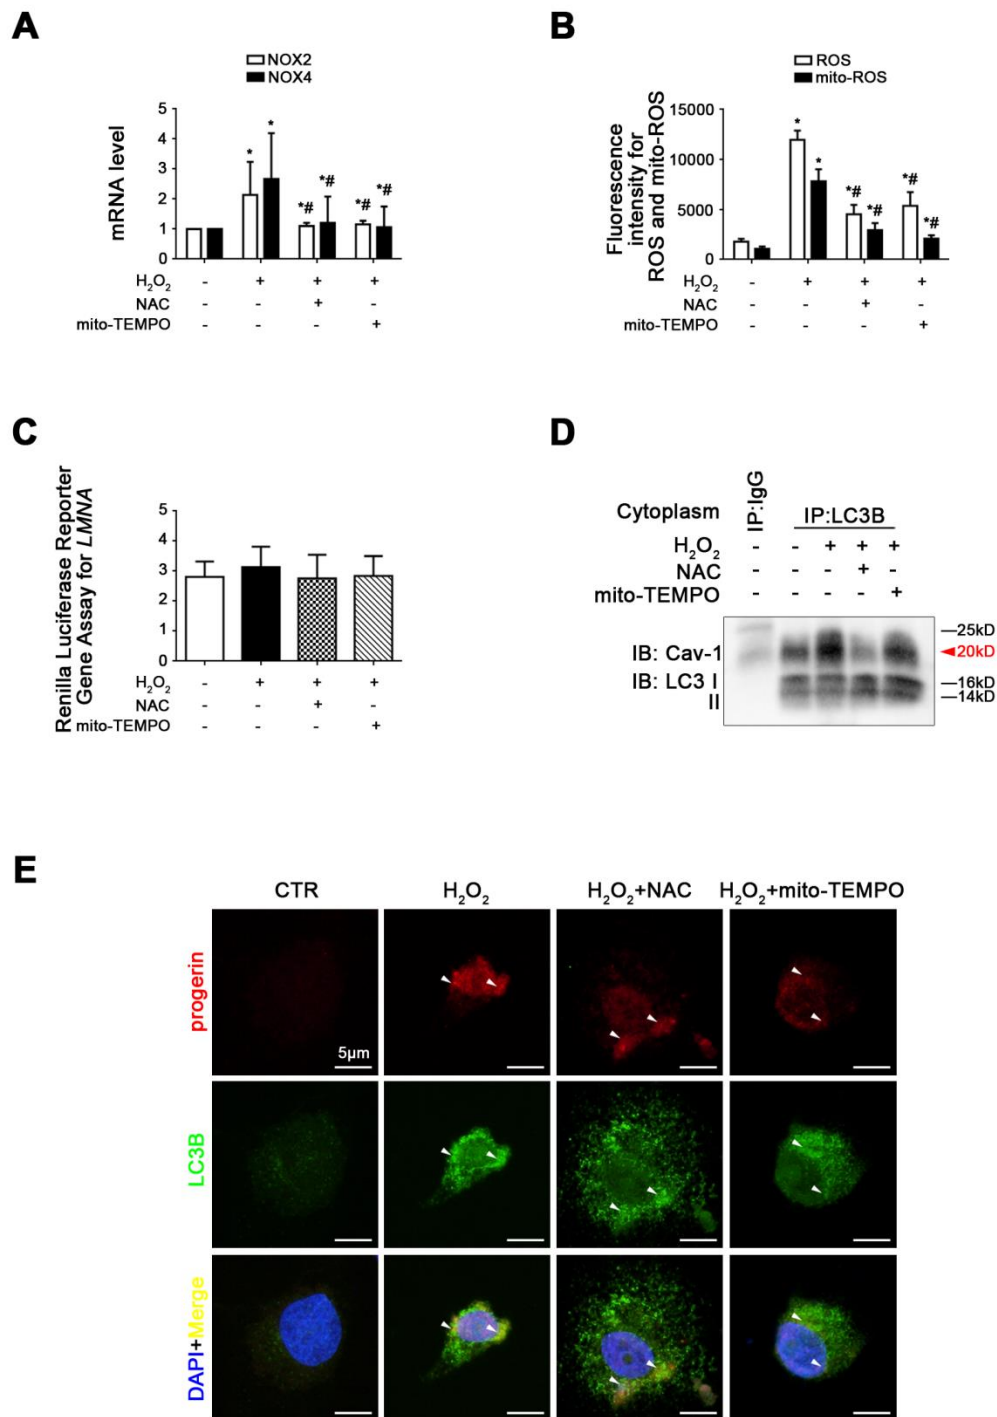

**Supplementary Figure S5 Antioxidants promote progerin-related nucleophagy and prevent autophagic degradation of cytoplasmic Cav-1 via inhibiting oxidative damage.**

Freshly rat primary LSECs, isolated from normal male SD rats, were pre-treated with NAC (1 mM) or mito-TEMPO (100 U/ml), and stimulated with H<sub>2</sub>O<sub>2</sub> (10  $\mu$ M) *in vitro* for 48 hours. **(A)** RT-qPCR analysis for mRNA levels of NOX2 and NOX4 of primary LSECs in the four groups (CTR, H<sub>2</sub>O<sub>2</sub>, H<sub>2</sub>O<sub>2</sub>+NAC, H<sub>2</sub>O<sub>2</sub>+mito-TEMPO). \**P*<0.05 versus the



control group;  $^{\#}P<0.05$  versus the  $H_2O_2$  group. **(B)** Fluorescence intensity for ROS and mito-ROS of primary LSECs in the four groups.  $^*P<0.05$  versus the control group;  $^{\#}P<0.05$  versus the  $H_2O_2$  group. **(C)** Renilla Luciferase Reporter Gene Assay for *LMNA* promoter activity of primary LSECs in the four groups.  $^*P<0.05$  versus the control group;  $^{\#}P<0.05$  versus the  $H_2O_2$  group. **(D)** The interaction of cytoplasmic LC3B with Cav-1 was detected by the co-IP assay. Cytoplasmic LC3B in primary LSECs was individually immunoprecipitated, and subsequently Cav-1 and LC3 II/I in cytoplasm of LSECs were subjected to immunoblotting analysis. **(E)** The immunocytochemical co-localization of progerin (red) with LC3B (green) of primary LSECs in the four groups (Scale bar: 5  $\mu$ m). Nuclei were showed by DAPI (blue).

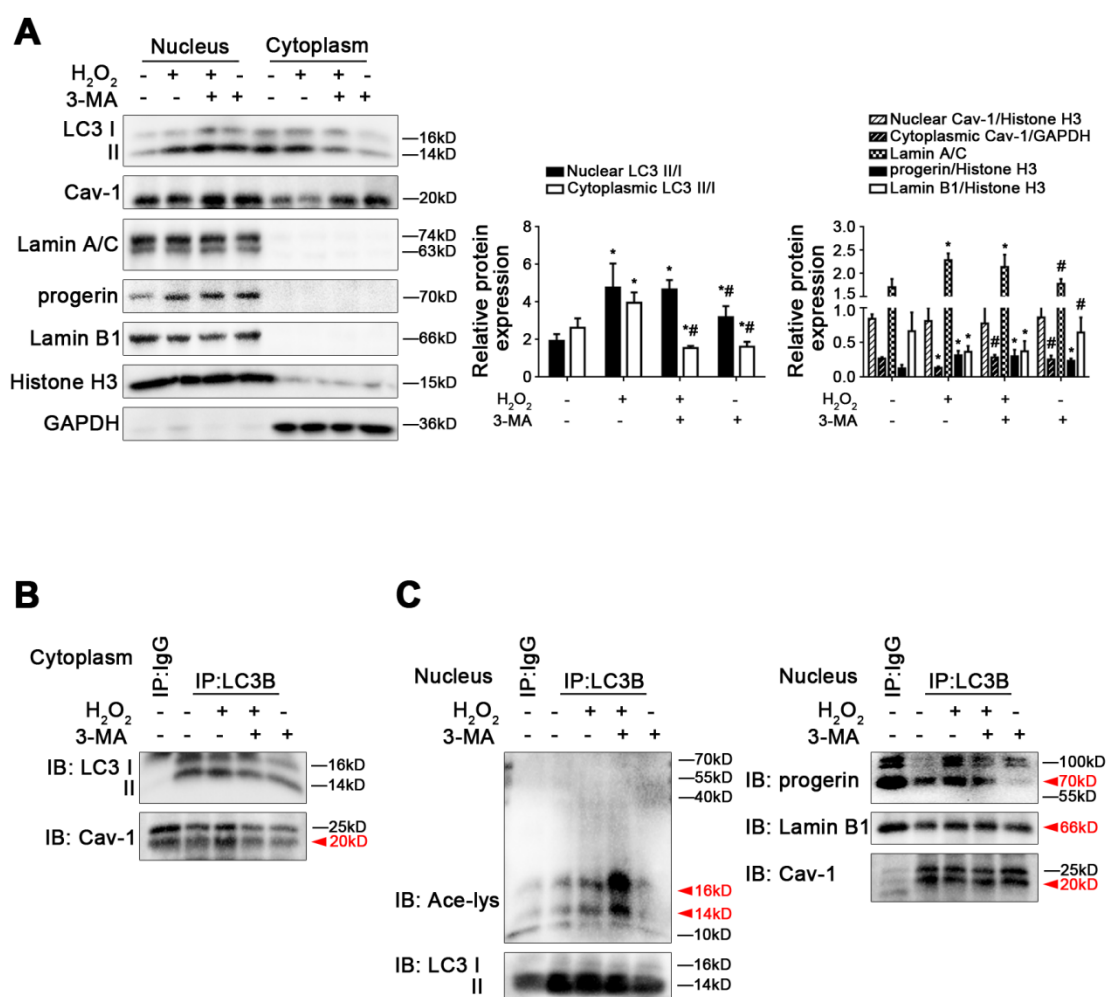

Supplementary Figure S6 Inhibition of autophagy with 3-MA rescues Cav-1 level, rather than affects the levels of progerin and Lamin B1.

Freshly rat primary LSECs, isolated from normal male SD rats, were pre-treated with rapamycin (10 nM) and stimulated with H<sub>2</sub>O<sub>2</sub> (10  $\mu$ M) for 48 hours. **(A)** Representative immunoblots of LC3 II/I, Cav-1, Lamin A/C, progerin, and Lamin B1 in nucleus and cytoplasm of primary LSECs in the four groups (CTR, H<sub>2</sub>O<sub>2</sub>, H<sub>2</sub>O<sub>2</sub>+3-MA, 3-MA). The relative protein expression and LC3 II/I expression in nucleus and cytoplasm were quantified in the two graphs (right). \**P*<0.05 versus the control group; #*P*<0.05 versus the H<sub>2</sub>O<sub>2</sub> group. **(B)** The interaction of cytoplasmic LC3B with Cav-1 was detected by the co-IP assay. Cytoplasmic LC3B in primary LSECs was individually immunoprecipitated, and subsequently Cav-1 and LC3 II/I in cytoplasm of LSECs in the four groups were subjected to immunoblotting analysis. **(C)** The interaction of nuclear LC3B with acetyl Lysine, progerin, Lamin B1, and Cav-1 was detected by the co-IP assay. Nuclear LC3B in primary LSECs was individually immunoprecipitated, and subsequently acetyl Lysine, progerin, Lamin B1, Cav-1, and LC3 II/I in nucleus of primary LSECs in the four groups were subjected to immunoblotting analysis.

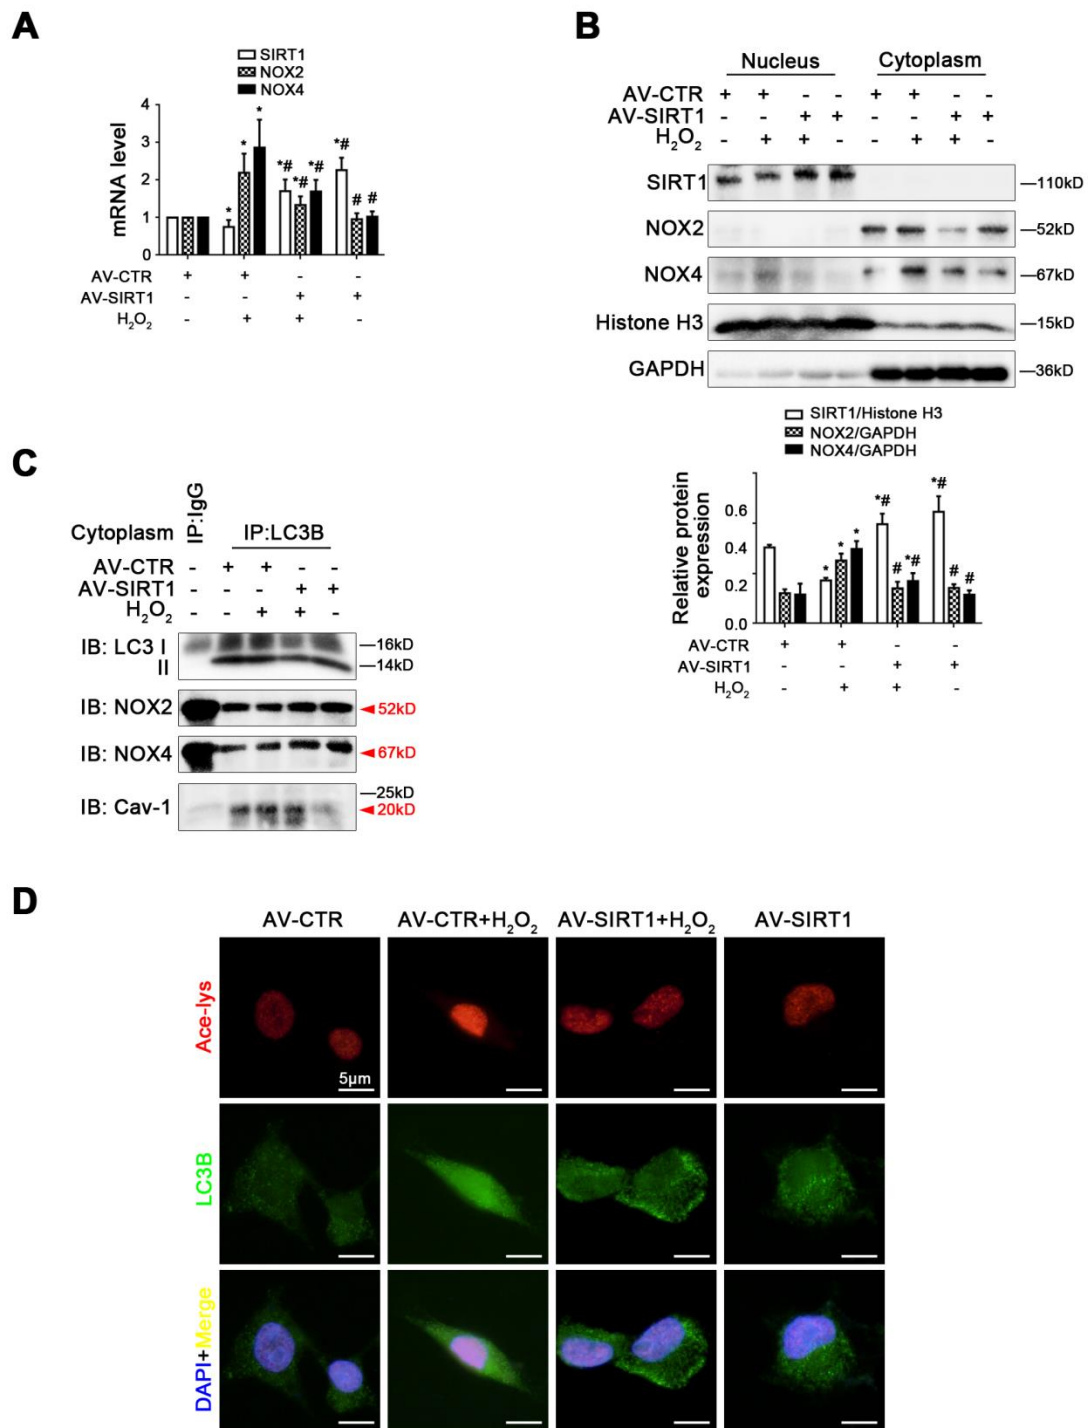

**Supplementary Figure S7 Overexpressing SIRT1 inhibits oxidative stress-induced Cav-1 degradation.**

Freshly rat primary LSECs were transfected with SIRT1 adenovirus vector (called AV-SIRT1) to overexpress SIRT1 or nontarget adenovirus vector (called AV-CTR), and then stimulated with H<sub>2</sub>O<sub>2</sub> (10 μM) for 48 hours. (A) RT-qPCR analysis for mRNA levels of SIRT1, NOX2, and NOX4 of primary LSECs in the four groups (AV-CTR,

AV-CTR+H<sub>2</sub>O<sub>2</sub>, AV-SIRT1+H<sub>2</sub>O<sub>2</sub>, AV-SIRT1). \**P*<0.05 versus the AV-CTR group; #*P*<0.05 versus the AV-CTR+H<sub>2</sub>O<sub>2</sub> group. **(B)** Representative immunoblots of SIRT1, NOX2, and NOX4 in nucleus and cytoplasm of primary LSECs in the four groups. The relative protein expression was quantified in the graph (below). \**P*<0.05 versus the AV-CTR group; #*P*<0.05 versus the AV-CTR+H<sub>2</sub>O<sub>2</sub> group. **(C)** The interaction of cytoplasmic LC3B with NOX2, NOX4, and Cav-1 was detected by the co-IP assay. Cytoplasmic LC3B in primary LSECs was individually immunoprecipitated, and subsequently NOX2, NOX4, Cav-1, and LC3 II/I in cytoplasm of primary LSECs in the four groups were subjected to immunoblotting analysis. **(D)** The immunocytochemical co-localization of acetyl Lysine (red) with LC3B (green) of primary LSECs in the four groups (Scale bar: 5 μm). Nuclei were showed by DAPI (blue).
